# Supplementary material
Source: Springer Nature journal article supplement (https://www.springermedizin.de/resource/supplementary/12937_2007_175_MOESM2_ESM.pdf/25654554)
Supplement: MOESM2 [file 25654554]

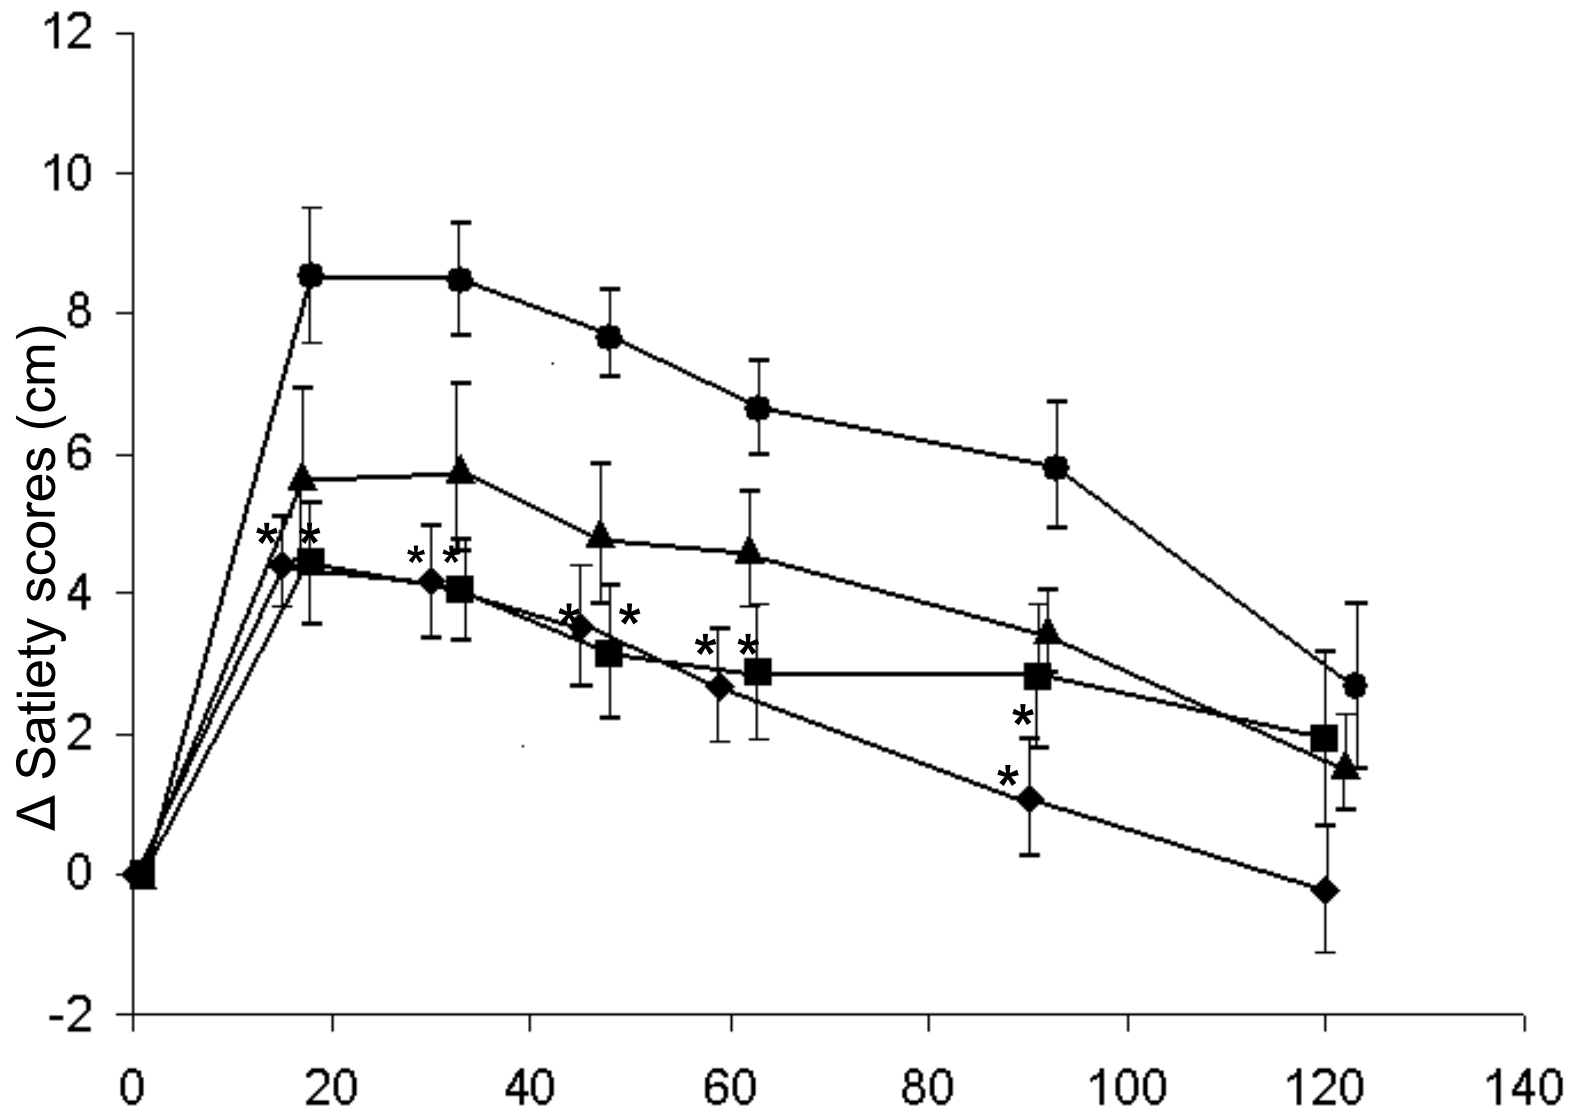

Time (min)

- ◆ White wheat bread (Ref. meal)
- White wheat bread and vinegar
- ▲ Wholemeal wheat bread and vinegar
- Whole-kernel wheat bread and vinegar
